# Supplementary material for: Discovery of Highly Trimethoprim-Resistant DfrB Dihydrofolate Reductases in Diverse Environmental Settings Suggests an Evolutionary Advantage Unrelated to Antibiotic Resistance
Source: MDPI journal article supplement (doi:10.3390/antibiotics11121768), 2022-12-07
Supplement: s1 [file s1]

## Supporting information

**Discovery of highly trimethoprim resistant DfrB dihydrofolate reductases in diverse environmental settings suggests an evolutionary advantage unrelated to antibiotic resistance**

**Stella Cellier-Goetghebeur<sup>1,2,3</sup>, Kiana Lafontaine<sup>1,2,3</sup>, Claudèle Lemay-St-Denis<sup>1,2,3</sup>, Princesse Tsamo<sup>1,2,3</sup>, Alexis Bonneau-Burke<sup>2,3,4</sup>, Janine N. Copp<sup>5</sup> and Joelle N. Pelletier<sup>1,2,3,4,\*</sup>**

<sup>1</sup>Department of Biochemistry and Molecular Medicine, Université de Montréal, Montréal, QC H3T 1J4, Canada

<sup>2</sup>PROTEO, The Québec Network for Research on Protein, Function, Engineering and Applications, Québec, QC G1V 0A6, Canada

<sup>3</sup>CGCC, Center in Green Chemistry and Catalysis, Montréal, QC H3A 0B8, Canada

<sup>4</sup>Chemistry Department, Université de Montréal, Montréal, QC H2V 0B3, Canada

<sup>5</sup>Michael Smith Laboratories, University of British Columbia, Vancouver, BC, Canada

\* Correspondence: joelle.pelletier@umontreal.ca

### Table of Contents:

Figure S1. Multiple sequence alignment of the newly identified *dfrB12-dfrB21*.

Figure S2. Similarity and identity shared between *dfrB1-dfrB21*.

Figure S3. Multiple sequence alignment of 20 newly identified *dfrB* homologues.

Table S1. Prediction of chromosomal or plasmidic location.

Table S2. Additional characteristics of the putative *dfrB* genes.

Table S3. Genomic context analyses of *dfrB6*, *dfrB7*, *dfrB9* and *dfrB11* genes.

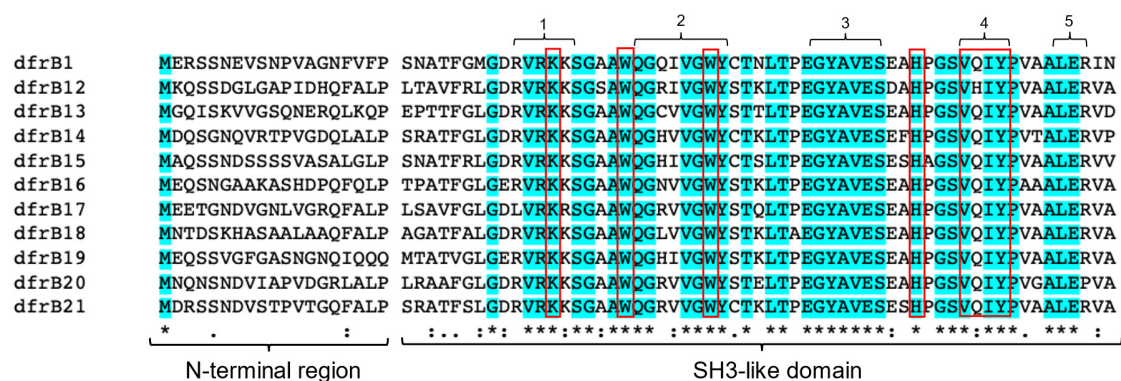

**Figure S1. Multiple sequence alignment of the newly identified *dfrB12-dfrB21*.** The *dfrB1* sequence serves as a reference. The 78 amino acid sequence comprises a poorly conserved, unstructured *N*-terminal region and a highly conserved region that encodes the SH3-like domain. The residues encoding the five  $\beta$  strands in the DfrB1 structure are identified with brackets and numbered. Amino acid conservation is indicated using standard annotation beneath the alignment and conserved residues are highlighted in cyan. Functionally and structurally important residues are framed in red. The alignment was produced using MAFFT.

|    | 1  | 2  | 3  | 4  | 5  | 6  | 7  | 9  | 10 | 11 | 12 | 13 | 14 | 15 | 16 | 17 | 18 | 19 | 20 | 21 |
|----|----|----|----|----|----|----|----|----|----|----|----|----|----|----|----|----|----|----|----|----|
| 1  |    | 86 | 85 | 83 | 92 | 92 | 87 | 87 | 88 | 86 | 76 | 73 | 82 | 79 | 78 | 82 | 81 | 73 | 79 | 87 |
| 2  | 78 |    | 88 | 82 | 83 | 86 | 79 | 88 | 95 | 91 | 85 | 74 | 85 | 83 | 82 | 85 | 85 | 78 | 83 | 88 |
| 3  | 78 | 86 |    | 86 | 85 | 85 | 78 | 88 | 94 | 91 | 78 | 74 | 86 | 82 | 85 | 82 | 86 | 76 | 79 | 90 |
| 4  | 77 | 74 | 79 |    | 85 | 82 | 77 | 85 | 86 | 85 | 72 | 72 | 83 | 85 | 76 | 78 | 77 | 72 | 78 | 85 |
| 5  | 88 | 79 | 82 | 77 |    | 92 | 89 | 85 | 86 | 85 | 76 | 73 | 81 | 76 | 78 | 81 | 79 | 72 | 78 | 82 |
| 6  | 87 | 82 | 83 | 77 | 91 |    | 89 | 86 | 87 | 87 | 79 | 78 | 82 | 77 | 81 | 83 | 82 | 77 | 82 | 83 |
| 7  | 84 | 74 | 76 | 72 | 89 | 87 |    | 79 | 80 | 80 | 74 | 71 | 77 | 72 | 73 | 77 | 73 | 70 | 76 | 79 |
| 9  | 77 | 85 | 85 | 74 | 77 | 79 | 72 |    | 92 | 88 | 82 | 76 | 86 | 83 | 81 | 83 | 85 | 78 | 82 | 90 |
| 10 | 82 | 92 | 92 | 79 | 83 | 86 | 78 | 88 |    | 95 | 82 | 74 | 89 | 85 | 82 | 85 | 86 | 77 | 85 | 94 |
| 11 | 78 | 88 | 90 | 77 | 81 | 83 | 77 | 86 | 92 |    | 79 | 76 | 88 | 82 | 82 | 82 | 83 | 77 | 82 | 91 |
| 12 | 67 | 78 | 72 | 65 | 69 | 73 | 67 | 74 | 76 | 74 |    | 76 | 77 | 76 | 81 | 86 | 79 | 78 | 85 | 81 |
| 13 | 68 | 73 | 72 | 65 | 68 | 73 | 66 | 73 | 73 | 74 | 68 |    | 73 | 73 | 78 | 74 | 74 | 78 | 76 | 72 |
| 14 | 73 | 79 | 83 | 73 | 76 | 78 | 71 | 81 | 86 | 85 | 69 | 72 |    | 82 | 79 | 82 | 77 | 77 | 81 | 87 |
| 15 | 76 | 76 | 77 | 74 | 76 | 74 | 70 | 74 | 78 | 74 | 68 | 69 | 76 |    | 74 | 77 | 74 | 74 | 77 | 85 |
| 16 | 68 | 78 | 76 | 67 | 68 | 72 | 63 | 76 | 76 | 74 | 73 | 72 | 72 | 68 |    | 79 | 81 | 83 | 78 | 79 |
| 17 | 71 | 76 | 77 | 69 | 71 | 74 | 67 | 74 | 77 | 74 | 73 | 72 | 74 | 67 | 72 |    | 82 | 78 | 86 | 81 |
| 18 | 69 | 79 | 77 | 72 | 71 | 74 | 66 | 78 | 78 | 76 | 73 | 72 | 71 | 69 | 76 | 72 |    | 77 | 82 | 82 |
| 19 | 68 | 73 | 71 | 64 | 67 | 72 | 65 | 72 | 72 | 72 | 74 | 73 | 71 | 69 | 78 | 69 | 71 |    | 77 | 74 |
| 20 | 72 | 78 | 76 | 72 | 72 | 77 | 68 | 78 | 81 | 77 | 74 | 72 | 77 | 76 | 72 | 77 | 73 | 68 |    | 82 |
| 21 | 79 | 85 | 88 | 79 | 78 | 81 | 76 | 86 | 92 | 88 | 74 | 71 | 85 | 78 | 73 | 77 | 77 | 69 | 79 |    |

**Figure S2. Similarity (top right) and identity (bottom left) shared between *dfrB1*-*dfrB21*.** The *dfrB* sequences are identified 1-21; there is no *dfrB8*. Values are percentages and are colored from a red (lowest sequence identity/similarity) to green gradient (highest sequence identity/similarity).

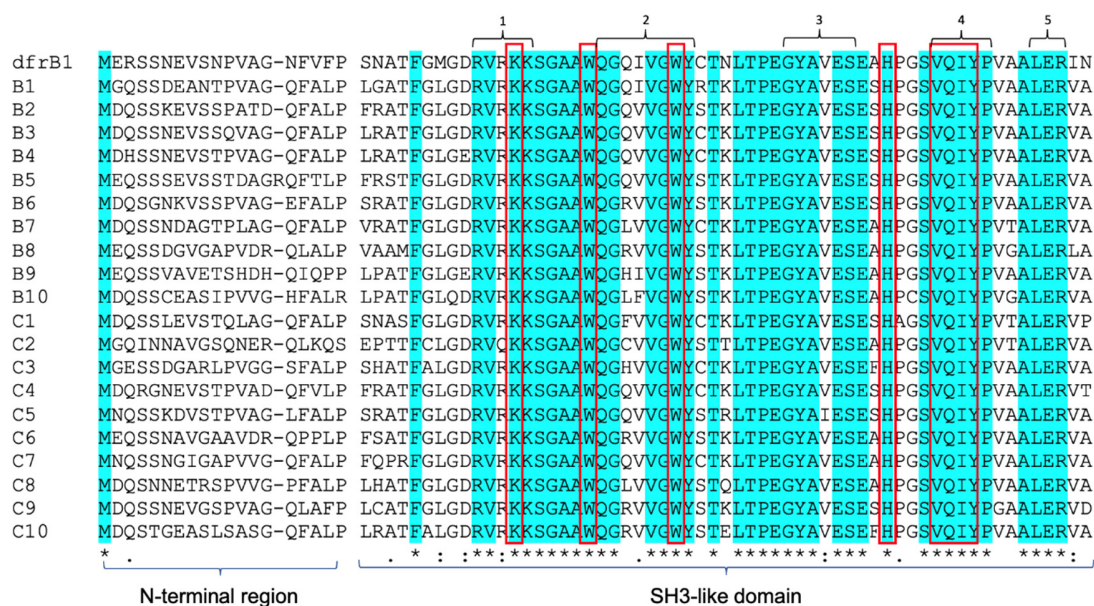

**Figure S3. Multiple sequence alignment of 20 newly identified putative *dfrB* homologues.** The *dfrB1* sequence serves as a reference. The 78 amino acid sequence comprises a poorly conserved, unstructured *N*-terminal region and a highly conserved region that encodes the SH3-like domain. The residues encoding the five  $\beta$  strands in the DfrB1 structure are identified with brackets and numbered. Amino acid conservation is indicated using standard annotation beneath the alignment and residues that are conserved between *dfrB1* and the newly identified putative *dfrB* are highlighted in cyan. Functionally and structurally important residues are framed in red. The alignment was produced using MAFFT.

**Table S1. Prediction of chromosomal or plasmidic location.**

| <b>Name</b>   | <b>JGI/IMG identifier</b> | <b>PlasForest<br/>prediction <sup>a</sup></b> | <b>PlasFlow<br/>prediction <sup>b</sup></b> |
|---------------|---------------------------|-----------------------------------------------|---------------------------------------------|
| <i>dfrB12</i> | Ga0062593_101421357       | Chromosome                                    | Plasmid                                     |
| <i>dfrB13</i> | Ga0062590_102580916       | Chromosome                                    | Plasmid                                     |
| <i>dfrB14</i> | Ga0066412_1097643         | Chromosome                                    | Plasmid                                     |
| <i>dfrB15</i> | Ga0075154_10665361        | Chromosome                                    | Plasmid                                     |
| <i>dfrB16</i> | Ga0190269_11200979        | Chromosome                                    | Unclassified                                |
| <i>dfrB17</i> | Ga0193596_1008267         | Chromosome                                    | Unclassified                                |
| <i>dfrB18</i> | Ga0213876_11554563        | Chromosome                                    | Unclassified                                |
| <i>dfrB19</i> | Ga0311334_10409960        | Chromosome                                    | Unclassified                                |
| <i>dfrB20</i> | Ga0307508_10008142        | Chromosome                                    | Plasmid                                     |
| <i>dfrB21</i> | Ga0394858_026559          | Chromosome                                    | Plasmid                                     |

<sup>a</sup> Contigs were classified as chromosomal or plasmidic using PlasForest.

<sup>b</sup> Contigs were classified as chromosomal or plasmidic using PlasFlow.

**Table S2. Additional characteristics of the putative *dfrB* genes.**

| <b>Name</b> | <b>GenBank / JGI ID <sup>a</sup></b> | <b>Host Organism <sup>a</sup></b> |
|-------------|--------------------------------------|-----------------------------------|
| B1          | MG649396                             | Uncultured bacterium              |
| B2          | AP024402                             | <i>Aeromonas caviae</i> , BPB     |
| B3          | JADMJN010000010                      | <i>Rhodferax</i> sp., BPB         |
| B4          | JABRWJ010000036                      | <i>Aquabacterium terrae</i> , BPB |
| B5          | CP049957                             | <i>Bordetella trematum</i> , BPB  |
| B6          | JAFEDL010000101                      | Proteobacteria bacterium          |
| B7          | JACPOK010000019                      | <i>Burkholderiales</i> bacterium  |
| B8          | JADWYS010000001                      | <i>Caenimonas</i> sp. BPB         |
| B9          | JADKEH010000029                      | <i>Rhodferax</i> sp., BPB         |
| B10         | LMUW01000222                         | <i>Xenophilus</i> sp., BPB        |
| C1          | Ga0214919_1000355031                 | <i>Comamonadaceae</i> , BPB       |
| C2          | Ga0075012_100199321                  | Undetermined                      |
| C3          | Ga0335084_100502587                  | <i>Comamonadaceae</i> , BPB       |
| C4          | Ga0435267_00540993_3287_3523         | <i>Comamonadaceae</i> , BPB       |
| C5          | Ga0394817_0033593_1221_1457          | Proteobacteria                    |
| C6          | JGI25613J43889_100117722             | Proteobacteria                    |
| C7          | Ga0239296_031039_1466_1702           | Gammaproteobacteria               |
| C8          | Ga0105245_101602713                  | <i>Burkholderiales</i>            |
| C9          | Ga0307515_101793572                  | Proteobacteria                    |
| C10         | rootL2_101999113                     | Undetermined                      |

<sup>a</sup> Information was retrieved on JGI/IMG or NCBI databases for each sequence, if available.

**Table S3. Genomic context analyses of *dfrB* genes.**

| Name and position <sup>a</sup>  | Genomic context length (bp) <sup>b</sup> | Environment <sup>c</sup>       | Species <sup>d</sup>              | Integron <sup>e</sup>   | Insertion sequences <sup>f</sup>                     | Organization <sup>g</sup> | Antibiotic resistance genes <sup>h</sup>                                                                 |
|---------------------------------|------------------------------------------|--------------------------------|-----------------------------------|-------------------------|------------------------------------------------------|---------------------------|----------------------------------------------------------------------------------------------------------|
| <i>dfrB6</i><br>14723..14959    | 22326                                    | Wastewater                     | <i>Salmonella enterica</i> , GPB  | Complete (11572..17068) | Tn3 transposase (18634..19188), IS110 (19267..20271) | Plasmid                   | <i>BEL-1</i> , <i>CmlA</i> , <i>QacE</i> , <i>Sul1</i> , <i>GNAT</i>                                     |
| <i>dfrB7</i><br>1048..1296      | 2333                                     | Salmon River, British Columbia | <i>Aeromonas hydrophila</i> , BPB | Complete (2..2250)      | None                                                 | Chromosome                | <i>aadA2</i>                                                                                             |
| <i>dfrB9</i><br>4409..4645      | 40047                                    | Clinical                       | <i>Enterobacteriaceae</i> , GPB   | Complete (2149..9133)   | Tn3 transposase (8670..10701)                        | Plasmid                   | <i>IMP-1</i> , <i>GNAT</i> , <i>AAC(6')-Ib4</i> , <i>Smr</i> , <i>CmlA</i> , <i>QacE</i> , <i>Sul1</i> , |
| <i>dfrB11</i><br>114140..114376 | 114566                                   | Groundwater (140-250m deep)    | <i>Betaproteobacteria</i>         | None                    | None                                                 | Chromosome                | None                                                                                                     |

<sup>a</sup> Sequences were retrieved from NCBI.

<sup>b</sup> Number of base pairs (bp) in genomic context.

<sup>c</sup> Environmental source was determined using the available information on the NCBI database.

<sup>d</sup> Species information was retrieved from NCBI

<sup>e</sup> Complete and incomplete (CALIN) integrons within 5 kbp of a *dfrB* were searched for with IntegronFinder. Where applicable, the type of MGE identified and its position in the contig are indicated.

<sup>f</sup> Searched for with ISFinder, within 5 kbp of a *dfrB*.

<sup>g</sup> Organization as chromosomal or plasmidic was predicted with PlasForest using DNA contig sequences.

<sup>h</sup> Searched for on the CARD database, within 5 kbp of a *dfrB*.
